# Supplementary material for: COVID-19 and public support for autonomous technologies—Did the pandemic catalyze a world of robots?
Source: PubMed Central journal article supplement (PMC9518891; doi:10.1371/journal.pone.0273941), 2022-09-28
Supplement: pone.0273941.s001.pdf [file pone.0273941.s001.pdf]

S1 Table.

S1 Table: AI-Enabled Autonomous System Support Regression Analysis, 2018.

|                                   | (1)<br>Cars<br>b/SE  | (2)<br>Surgery<br>b/SE | (3)<br>Cyber Defense<br>b/SE | (4)<br>Weapon Systems<br>b/SE |
|-----------------------------------|----------------------|------------------------|------------------------------|-------------------------------|
| Gender                            | -0.321***<br>(0.076) | -0.339***<br>(0.096)   | -0.299***<br>(0.100)         | -0.184*<br>(0.100)            |
| Age                               | -0.008***<br>(0.002) | -0.002<br>(0.002)      | -0.003<br>(0.003)            | 0.002<br>(0.002)              |
| Level of Education                | 0.011<br>(0.025)     | 0.039<br>(0.025)       | -0.018<br>(0.024)            | -0.038*<br>(0.020)            |
| Family Income                     | 0.015<br>(0.010)     | 0.022**<br>(0.010)     | 0.025***<br>(0.008)          | 0.013<br>(0.012)              |
| Partisanship: 1 = Dem, 7 = GOP    | -0.016<br>(0.019)    | 0.004<br>(0.017)       | 0.040**<br>(0.016)           | 0.094***<br>(0.020)           |
| Top 10 Auto Manufacturing State   | 0.131*<br>(0.071)    |                        |                              |                               |
| Top 10 HC Employment State        |                      | -0.164**<br>(0.067)    |                              |                               |
| Prior AI Knowledge                | 0.242***<br>(0.051)  | 0.209***<br>(0.054)    | 0.164***<br>(0.048)          | 0.146***<br>(0.038)           |
| Urban Area                        | -0.081**<br>(0.034)  | 0.041<br>(0.037)       | -0.031<br>(0.043)            | 0.020<br>(0.031)              |
| Current or Prior Military Service |                      |                        | -0.019<br>(0.121)            | -0.136<br>(0.144)             |
| Constant                          | 2.856***<br>(0.125)  | 2.314***<br>(0.206)    | 2.577***<br>(0.235)          | 1.946***<br>(0.151)           |
| Observations                      | 863                  | 863                    | 863                          | 863                           |
| $R^2$                             | 0.115                | 0.081                  | 0.072                        | 0.074                         |
| Log Likelihood                    | -1158.252            | -1163.314              | -1170.829                    | -1154.365                     |
| F                                 | 32.966               | 8.544                  | 10.892                       | 6.335                         |

Notes: St\*p<0.10; \*\*p< 0.05; \*\*\*p<0.01.
