# Supplementary material for: COVID-19 and public support for autonomous technologies—Did the pandemic catalyze a world of robots?
Source: PubMed Central journal article supplement (PMC9518891; doi:10.1371/journal.pone.0273941), 2022-09-28
Supplement: pone.0273941.s002.pdf [file pone.0273941.s002.pdf]

S2 Table.

S2 Table: AI-Enabled Autonomous System Support Regression Analysis, 2020.

|                                   | (1)<br>Cars<br>b/SE  | (2)<br>Surgery<br>b/SE | (3)<br>Cyber Defense<br>b/SE | (4)<br>Weapon Systems<br>b/SE |
|-----------------------------------|----------------------|------------------------|------------------------------|-------------------------------|
| Gender                            | -0.388***<br>(0.079) | -0.412***<br>(0.064)   | -0.348***<br>(0.106)         | -0.070<br>(0.091)             |
| Age                               | -0.008***<br>(0.002) | -0.004<br>(0.003)      | -0.000<br>(0.002)            | 0.002<br>(0.003)              |
| Level of Education                | 0.059**<br>(0.023)   | 0.036<br>(0.038)       | -0.006<br>(0.032)            | -0.033<br>(0.027)             |
| Family Income                     | 0.001<br>(0.009)     | -0.001<br>(0.019)      | 0.014<br>(0.011)             | 0.018<br>(0.011)              |
| Partisanship: 1 = Dem, 7 = GOP    | -0.076***<br>(0.016) | -0.007<br>(0.019)      | 0.007<br>(0.019)             | 0.044***<br>(0.014)           |
| Top 10 Auto Manufacturing State   | -0.177*<br>(0.091)   |                        |                              |                               |
| Top 10 HC Employment State        |                      | 0.153*<br>(0.089)      |                              |                               |
| Prior AI Knowledge                | 0.100***<br>(0.026)  | 0.119***<br>(0.030)    | 0.061**<br>(0.029)           | -0.011<br>(0.033)             |
| Pre-COVID Ridesharing Use         | 0.188***<br>(0.033)  |                        |                              |                               |
| Drivers License                   | -0.136<br>(0.160)    |                        |                              |                               |
| Urban Area                        | -0.006<br>(0.038)    | -0.014<br>(0.035)      | 0.004<br>(0.028)             | 0.032<br>(0.030)              |
| Current or Prior Military Service |                      |                        | -0.082<br>(0.127)            | -0.018<br>(0.136)             |
| COVID-19 Death Family/Friends     |                      | 0.197**<br>(0.079)     |                              |                               |
| Constant                          | 2.794***<br>(0.234)  | 2.730***<br>(0.197)    | 2.604***<br>(0.204)          | 2.221***<br>(0.210)           |
| Observations                      | 818                  | 874                    | 874                          | 874                           |
| $R^2$                             | 0.200                | 0.114                  | 0.058                        | 0.064                         |
| Log Likelihood                    | -1057.748            | -1134.013              | -1165.284                    | -1158.325                     |
| F                                 | 20.797               | 15.195                 | 10.491                       | 7.761                         |

Notes: St\*p<0.10; \*\*p< 0.05; \*\*\*p<0.01.
